# Supplementary material for: Explainable Preoperative Automated Machine Learning Prediction Model for Cardiac Surgery-Associated Acute Kidney Injury
Source: MDPI journal article supplement (doi:10.3390/jcm11216264), 2022-10-24
Supplement: s1 [file s1]

**Supplementary Figure S1:** Spearman's rank correlation demonstrated no significant correlations

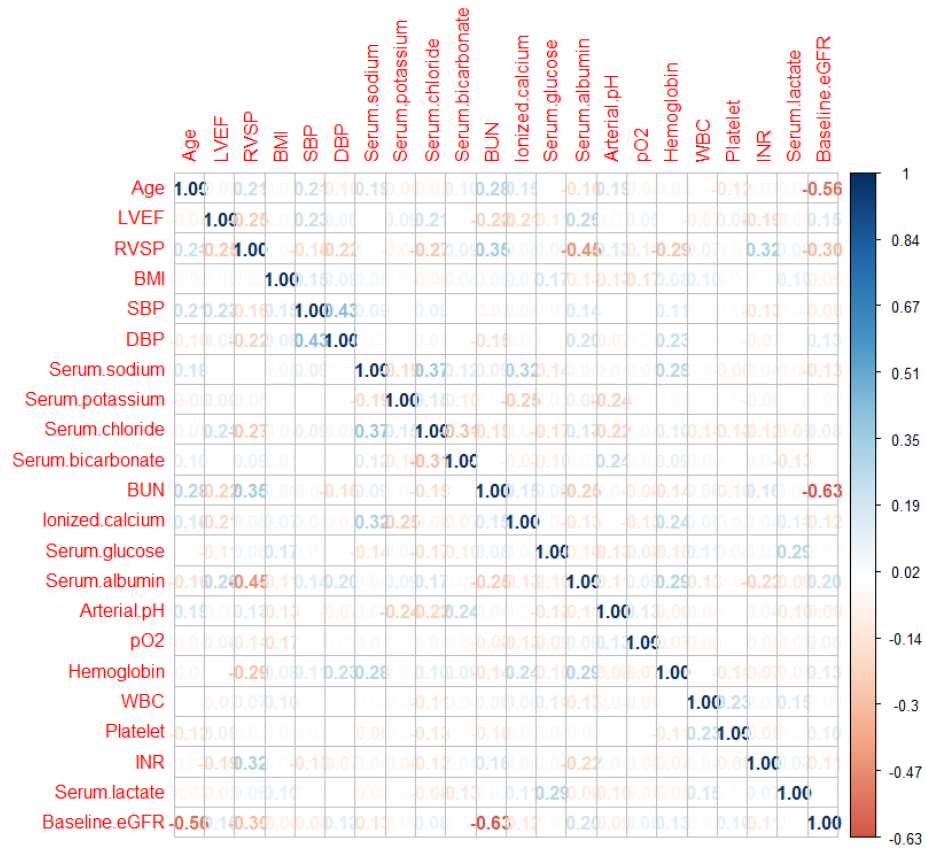

**Supplementary Figure S2:** The optimal number of variables (69 variables) were identified by the most optimal A) accuracy and B) kappa metrics using 5 times repeated 10-fold cross validation.

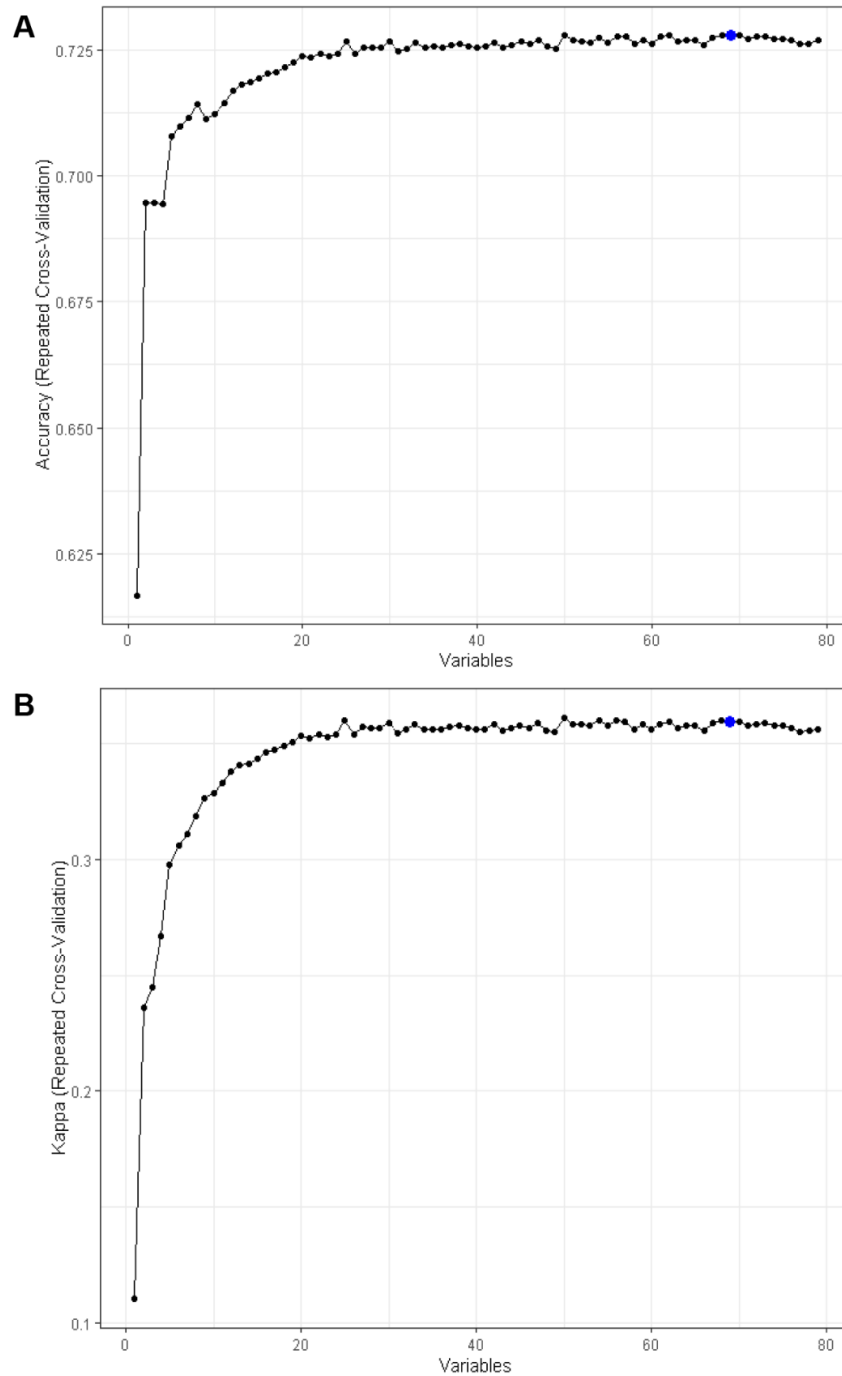

**Supplementary Figure S3:** Pruned decision tree associated with the minimal error

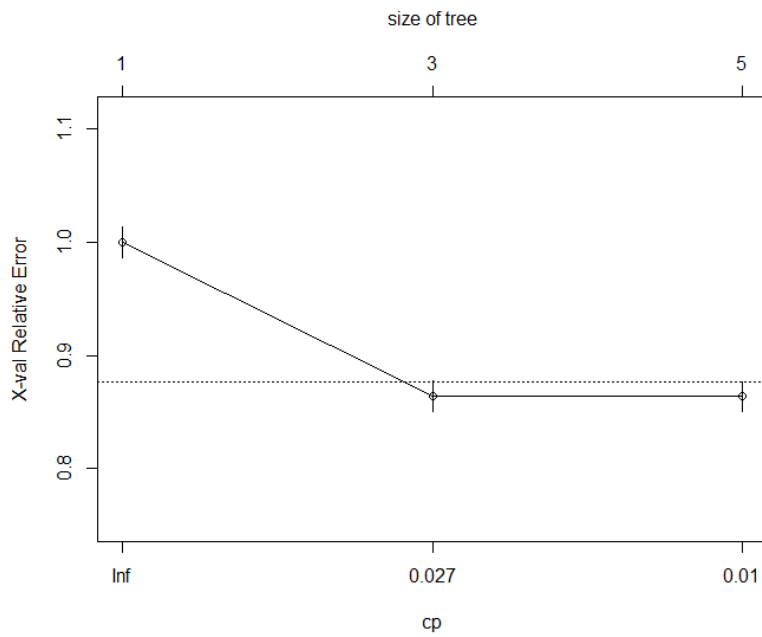

**Supplementary Figure S4:** Number of trees of RF model which yielded the lowest error rate

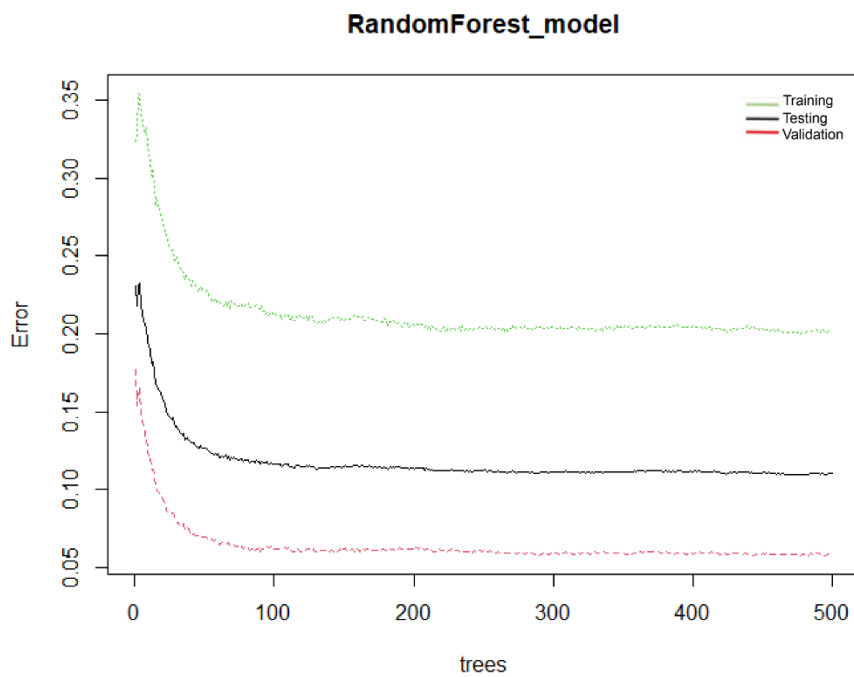

**Supplementary Figure S5:** Simple decision tree model showing the classification of patients who had CSA-AKI (1) and did not (0) have CSA-AKI. The numbers with two decimals in each cell means the probability of mortality in each classification tree. The blue or green color becomes dense when it is more likely to die or not. The % number in the boxes denotes the percentage of patients with each discriminating variable from CART (Classification and Regression Tree) analysis.

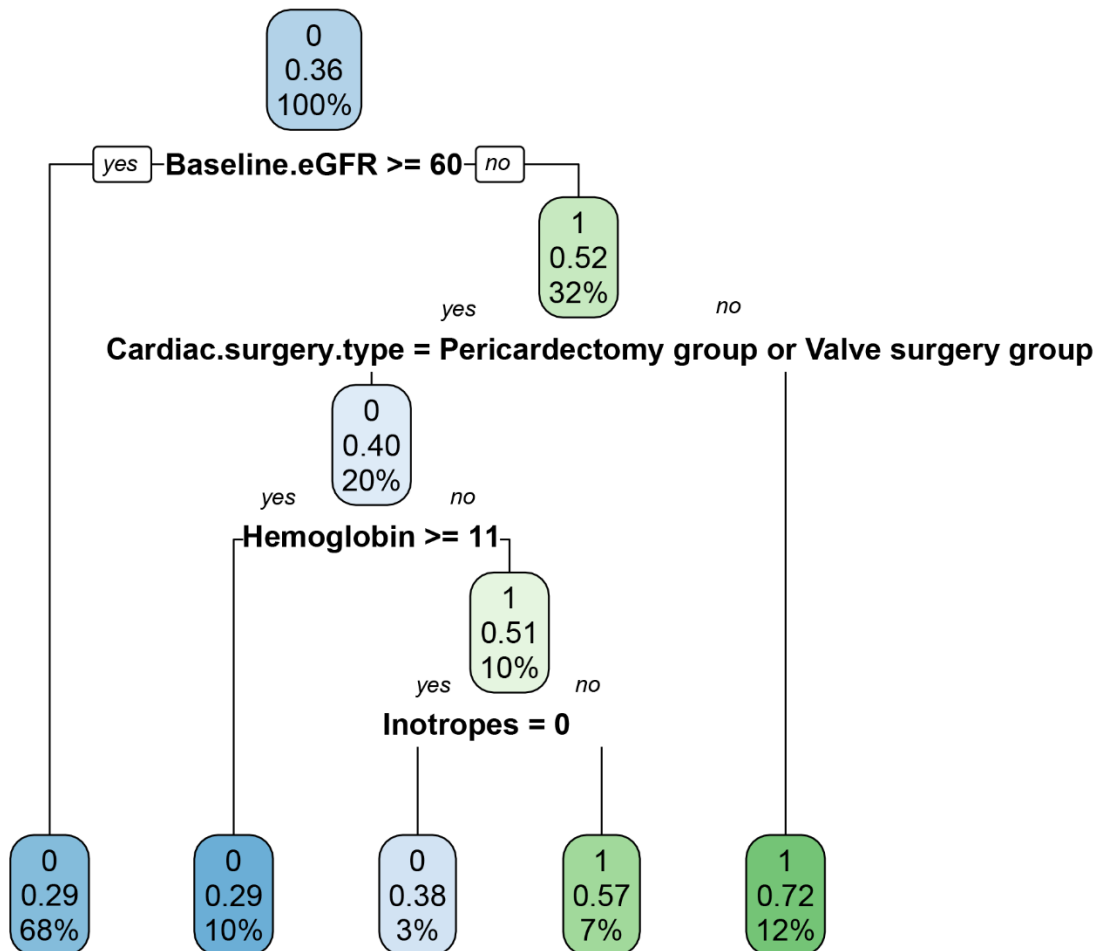

**Supplementary Table S1** Leaderboard of top 45 autoML models for CSA-AKI ranked by evaluation metrics using validation dataset

| Rank | Model ID                                                | AUC               | Log loss          | RMSE              | MSE               |
|------|---------------------------------------------------------|-------------------|-------------------|-------------------|-------------------|
| 1    | StackedEnsemble_AllModels_3_AutoML_1_20211031_170047    | 0.777477459373283 | 0.546459347839992 | 0.428101258420667 | 0.183270687461359 |
| 2    | StackedEnsemble_AllModels_2_AutoML_1_20211031_170047    | 0.773762554202448 | 0.541472780910445 | 0.425124160623815 | 0.180730551946103 |
| 3    | StackedEnsemble_AllModels_1_AutoML_1_20211031_170047    | 0.773350035055754 | 0.541923951699646 | 0.425351136451643 | 0.180923589280704 |
| 4    | StackedEnsemble_BestOfFamily_1_AutoML_1_20211031_170047 | 0.773241741802089 | 0.541880114043628 | 0.425698096353072 | 0.18121886923863  |
| 5    | StackedEnsemble_BestOfFamily_3_AutoML_1_20211031_170047 | 0.772737675781163 | 0.543015006080206 | 0.425686048688056 | 0.18120861204765  |
| 6    | StackedEnsemble_BestOfFamily_2_AutoML_1_20211031_170047 | 0.772442939503146 | 0.542787093883418 | 0.425595799092307 | 0.181131784205019 |
| 7    | GBM_1_AutoML_1_20211031_170047                          | 0.771870771539193 | 0.545029939918007 | 0.427050289427436 | 0.182371949700057 |
| 8    | GBM_grid_1_AutoML_1_20211031_170047_model_2             | 0.77171223914723  | 0.544501614697186 | 0.426967799142296 | 0.182301501504416 |
| 9    | GBM_grid_1_AutoML_1_20211031_170047_model_11            | 0.770116309187287 | 0.546966245682808 | 0.427927798932142 | 0.183122201098908 |
| 10   | GBM_grid_1_AutoML_1_20211031_170047_model_16            | 0.769074126173921 | 0.545687661410384 | 0.427632091422274 | 0.182869205614188 |
| 11   | GBM_grid_1_AutoML_1_20211031_170047_model_6             | 0.768387524617178 | 0.546875946078973 | 0.427757481549014 | 0.182976463021155 |
| 12   | GBM_5_AutoML_1_20211031_170047                          | 0.767743347221664 | 0.547846265522666 | 0.428392244515318 | 0.183519915160872 |
| 13   | GBM_grid_1_AutoML_1_20211031_170047_model_14            | 0.765551804366563 | 0.55048346881313  | 0.429592621739097 | 0.184549820652671 |
| 14   | GBM_grid_1_AutoML_1_20211031_170047_model_7             | 0.764637452049534 | 0.551072950563168 | 0.43104684791713  | 0.185801385099293 |
| 15   | GBM_3_AutoML_1_20211031_170047                          | 0.763708027991015 | 0.549131275569399 | 0.428857526287251 | 0.18391877785322  |
| 16   | GBM_grid_1_AutoML_1_20211031_170047_model_1             | 0.763258108596921 | 0.549864223764978 | 0.429892682456671 | 0.184807718429792 |
| 17   | GBM_2_AutoML_1_20211031_170047                          | 0.761695113183196 | 0.553063273816373 | 0.431086772286367 | 0.185835805240278 |
| 18   | GBM_grid_1_AutoML_1_20211031_170047_model_10            | 0.75964423991533  | 0.553470882528734 | 0.430816680698685 | 0.185603012368232 |
| 19   | GBM_grid_1_AutoML_1_20211031_170047_model_9             | 0.759394718861782 | 0.554178650562614 | 0.430772692939089 | 0.185565112981995 |
| 20   | GBM_grid_1_AutoML_1_20211031_170047_model_12            | 0.757099906666845 | 0.555638148301273 | 0.431567430420564 | 0.186250446999809 |
| 21   | GLM_1_AutoML_1_20211031_170047                          | 0.756497595219913 | 0.553505293766212 | 0.431628046457462 | 0.186302770488685 |
| 22   | GBM_grid_1_AutoML_1_20211031_170047_model_3             | 0.753327505593291 | 0.55841600312415  | 0.433440402972686 | 0.187870582929124 |
| 23   | GBM_grid_1_AutoML_1_20211031_170047_model_8             | 0.752950153843406 | 0.560788122592001 | 0.43500302433334  | 0.189227631179152 |
| 24   | GBM_4_AutoML_1_20211031_170047                          | 0.751895690151789 | 0.560328570623772 | 0.434198384756095 | 0.188528237324802 |
| 25   | GBM_grid_1_AutoML_1_20211031_170047_model_15            | 0.751718178529802 | 0.558503796685916 | 0.433656524835367 | 0.188057981532287 |
| 26   | DRF_1_AutoML_1_20211031_170047                          | 0.751522804103086 | 0.561696310614395 | 0.434073819875047 | 0.188420081100914 |
| 27   | XRT_1_AutoML_1_20211031_170047                          | 0.750703906148824 | 0.564321529899464 | 0.435734593358329 | 0.189864635849148 |
| 28   | GBM_grid_1_AutoML_1_20211031_170047_model_5             | 0.750687159769391 | 0.564779282302757 | 0.43698478709019  | 0.190955704148259 |
| 29   | GBM_grid_1_AutoML_1_20211031_170047_model_4             | 0.749163797453657 | 0.563991714533463 | 0.436664272538075 | 0.190675686911206 |
| 30   | DeepLearning_grid_2_AutoML_1_20211031_170047_model_3    | 0.743165802553488 | 2.79562336658503  | 0.784032510934837 | 0.614706978202786 |
| 31   | DeepLearning_1_AutoML_1_20211031_170047                 | 0.742032630878537 | 4.01529192567497  | 0.603006889452044 | 0.36361730872663  |
| 32   | GBM_grid_1_AutoML_1_20211031_170047_model_13            | 0.737196276498354 | 0.573362348760472 | 0.439859917549921 | 0.193476747067024 |
| 33   | DeepLearning_grid_2_AutoML_1_20211031_170047_model_2    | 0.732429698699141 | 0.799401867531981 | 0.467196971538785 | 0.218273010215012 |
| 34   | DeepLearning_grid_1_AutoML_1_20211031_170047_model_4    | 0.728321253611636 | 5.25817090316428  | 0.58075944210616  | 0.337281529595458 |
| 35   | DeepLearning_grid_1_AutoML_1_20211031_170047_model_1    | 0.721024856092779 | 4.337114606437    | 0.597591667897616 | 0.357115801540654 |
| 36   | DeepLearning_grid_1_AutoML_1_20211031_170047_model_10   | 0.71610532802808  | 0.839130551523699 | 0.488394471892734 | 0.238529160175382 |
| 37   | DeepLearning_grid_1_AutoML_1_20211031_170047_model_3    | 0.70901658561419  | 0.668857030587868 | 0.46202334289069  | 0.213465569375888 |
| 38   | DeepLearning_grid_1_AutoML_1_20211031_170047_model_7    | 0.691003063471011 | 1.57894249020104  | 0.52335982625557  | 0.27390550773826  |

|    |                                                       |                   |                  |                   |                   |
|----|-------------------------------------------------------|-------------------|------------------|-------------------|-------------------|
| 39 | DeepLearning_grid_1_AutoML_1_20211031_170047_model_6  | 0.6767585931255   | 1.51597567374466 | 0.585466655337274 | 0.342771204511815 |
| 40 | DeepLearning_grid_2_AutoML_1_20211031_170047_model_1  | 0.664819541015233 | 1.20588631138269 | 0.621203989848743 | 0.385894397003997 |
| 41 | DeepLearning_grid_1_AutoML_1_20211031_170047_model_11 | 0.643044223838806 | 7.2360007897259  | 0.727563210285326 | 0.52934822496069  |
| 42 | DeepLearning_grid_1_AutoML_1_20211031_170047_model_2  | 0.639517436330265 | 1.45472916315543 | 0.558980899338536 | 0.312459645825318 |
| 43 | DeepLearning_grid_1_AutoML_1_20211031_170047_model_5  | 0.611470600056268 | 2.16872577289551 | 0.57796538518834  | 0.334043986475907 |
| 44 | DeepLearning_grid_1_AutoML_1_20211031_170047_model_9  | 0.519775799472154 | 2.96089524964053 | 0.600987434021033 | 0.361185895851186 |
| 45 | DeepLearning_grid_1_AutoML_1_20211031_170047_model_8  | 0.506126383809154 | 6.16567269906814 | 0.602334403271588 | 0.36280673336454  |

Abbreviations: GBM, gradient boosting machine; RMSE, Root Mean Square Error.

**Supplementary Table S2.** Development of multivariable logistic regression model to predict acute kidney injury after cardiac surgery using stepwise variable selection in the training dataset

|                               | Univariate analysis |         | Multivariate analysis |         |
|-------------------------------|---------------------|---------|-----------------------|---------|
|                               | OR (95% CI)         | p-value | OR (95% CI)           | p-value |
| Age (years)                   | 1.02 (1.01-1.02)    | <0.001  | 0.99 (0.99-1.00)      | 0.01    |
| Male sex                      | 1.22 (1.11-1.33)    | <0.001  | 1.33 (1.19-1.48)      | <0.001  |
| Race                          |                     |         |                       |         |
| - White                       | 1 (reference)       |         | 1 (reference)         |         |
| - Black                       | 1.84 (1.26-2.67)    | 0.10    | 2.01 (1.29-3.13)      | 0.002   |
| - Asian                       | 0.75 (0.53-1.06)    | 0.001   | 0.95 (0.65-1.40)      | 0.79    |
| - Other                       | 1.00 (0.76-1.32)    | 0.98    | 1.05 (0.77-1.45)      | 0.74    |
| Body mass index (kg/m2)       | 1.03 (1.02-1.04)    | <0.001  | 1.01 (1.00-1.02)      | 0.008   |
| Admission type                |                     |         |                       |         |
| - Elective                    | 1 (reference)       |         |                       |         |
| - Urgent                      | 1.99 (1.74-2.28)    | <0.001  |                       |         |
| - Emergent                    | 2.02 (1.69-2.41)    | <0.001  |                       |         |
| Cardiac surgery type          |                     |         |                       |         |
| - CABG                        | 1 (reference)       |         | 1 (reference)         |         |
| - Valve surgery               | 0.53 (0.47-0.60)    | <0.001  | 0.51 (0.43-0.59)      | <0.001  |
| - CABG + valve surgery        | 1.41 (1.23-1.61)    | <0.001  | 1.06 (0.90-1.26)      | 0.46    |
| - Heart transplant            | 8.16 (4.28-15.55)   | <0.001  | 5.64 (2.78-11.46)     | <0.001  |
| - Pericardiectomy             | 0.61 (0.46-0.82)    | 0.001   | 0.78 (0.56-1.10)      | 0.15    |
| Comorbidity                   |                     |         |                       |         |
| - Congestive heart failure    | 1.38 (1.25-1.52)    | <0.001  |                       |         |
| - Arrhythmia                  | 1.97 (1.76-2.21)    | <0.001  | 1.47 (1.30-1.67)      | <0.001  |
| - Valvular disease            | 0.98 (0.87-1.11)    | 0.79    |                       |         |
| - Peripheral vascular disease | 1.75 (1.61-1.91)    | <0.001  | 1.40 (1.27-1.54)      | <0.001  |
| - Hypertension; uncomplicated | 1.11 (0.99-1.23)    | 0.05    | 1.24 (1.09-1.42)      | 0.001   |
| - Hypertension; complicated   | 2.23 (2.04-2.43)    | <0.001  | 1.46 (1.30-1.64)      | <0.001  |
| - Paralysis                   | 2.78 (1.95-3.96)    | <0.001  |                       |         |
| - Neurological disorders      | 2.13 (1.68-2.71)    | <0.001  |                       |         |
| - COPD                        | 1.52 (1.37-1.67)    | <0.001  |                       |         |
| - Diabetes; no complications  | 1.63 (1.47-1.81)    | <0.001  |                       |         |
| - Diabetes; complications     | 1.89 (1.68-2.11)    | <0.001  |                       |         |
| - Hypothyroidism              | 1.16 (1.04-1.31)    | 0.01    |                       |         |
| - Liver disease               | 1.98 (1.64-2.37)    | <0.001  | 1.33 (1.07-1.65)      | 0.01    |
| - Peptic ulcer disease        | 2.16 (1.24-3.75)    | 0.006   |                       |         |
| - Lymphoma                    | 1.90 (1.25-2.89)    | 0.003   |                       |         |
| - Solid cancer                | 1.09 (0.82-1.45)    | 0.56    |                       |         |
| - Connective tissue disease   | 1.07 (0.88-1.31)    | 0.48    |                       |         |
| - Coagulopathy                | 2.12 (1.95-2.31)    | <0.001  | 1.56 (1.42-1.72)      | <0.001  |
| - Obesity                     | 1.46 (1.33-1.60)    | <0.001  | 1.23 (1.09-1.40)      | 0.001   |
|                               | 2.37 (1.74-3.23)    | <0.001  |                       |         |

|                                      |                   |        |                  |        |
|--------------------------------------|-------------------|--------|------------------|--------|
| - Weight loss                        | 1.98 (1.36-2.88)  | <0.001 |                  |        |
| - Blood loss anemia                  | 1.62 (1.33-1.97)  | <0.001 |                  |        |
| - Anemia                             | 1.31 (0.94-1.82)  | 0.11   |                  |        |
| - Drug abuse                         | 3.17 (1.64-6.11)  | 0.001  |                  |        |
| - Psychosis                          | 1.19 (1.05-1.35)  | 0.006  |                  |        |
| - Depression                         |                   |        |                  |        |
| Echo finding                         |                   |        |                  |        |
| - LVEF                               | 0.97 (0.97-0.98)  | <0.001 |                  |        |
| - RVSP                               | 1.03 (1.03-1.04)  | <0.001 | 1.01 (1.01-1.02) | <0.001 |
| Systolic blood pressure (mmHg)       | 1.01 (1.00-1.01)  | <0.001 | 1.01 (1.00-1.01) | <0.001 |
| Diastolic blood pressure (mmHg)      | 0.99 (0.99-1.00)  | <0.001 |                  |        |
| IABP use                             | 2.78 (2.04-3.79)  | <0.001 |                  |        |
| Medications                          |                   |        |                  |        |
| - Aspirin                            | 1.31 (1.17-1.47)  | <0.001 | 0.69 (0.59-0.81) | <0.001 |
| - Beta-blockers                      | 1.97 (1.78-2.19)  | <0.001 | 1.25 (1.09-1.44) | 0.002  |
| - Digoxin                            | 3.88 (2.64-5.68)  | <0.001 |                  |        |
| - Anti-anginal medications           | 1.55 (1.37-1.75)  | <0.001 |                  |        |
| - Anti-arrhythmic medications        | 1.36 (1.24-1.48)  | <0.001 | 1.23 (1.11-1.36) | <0.001 |
| - Statins                            | 1.91 (1.70-2.15)  | <0.001 |                  |        |
| - ACEIs                              | 1.59 (1.32-1.90)  | <0.001 |                  |        |
| - ARBs                               | 2.05 (1.56-2.70)  | <0.001 |                  |        |
| - NSAIDs                             | 0.70 (0.59-0.84)  | <0.001 |                  |        |
| - Benzodiazepine                     | 0.88 (0.80-0.95)  | 0.003  | 0.88 (0.79-0.98) | 0.02   |
| - Vancomycin                         | 1.06 (0.25-4.44)  | 0.94   |                  |        |
| - Contrast                           | 1.50 (1.26-1.79)  | <0.001 |                  |        |
| - Diuretics                          | 2.59 (2.28-2.94)  | <0.001 |                  |        |
| - Calcium channel blockers           | 1.62 (1.37-1.90)  | <0.001 |                  |        |
| - Vasopressors/inotropes             | 1.93 (1.75-2.13)  | <0.001 | 1.36 (1.22-1.53) | <0.001 |
| - Insulin                            | 2.20 (2.01-2.41)  | <0.001 | 1.28 (1.15-1.43) | <0.001 |
| Laboratory data                      |                   |        |                  |        |
| - Sodium (mEq/L)                     | 0.99 (0.98-0.99)  | 0.04   | 0.97 (0.96-0.99) | <0.001 |
| - Potassium (mEq/L)                  | 0.76 (0.70-0.82)  | <0.001 |                  |        |
| - Chloride (mEq/L)                   | 0.93 (0.91-0.94)  | <0.001 |                  |        |
| - Bicarbonate (mEq/L)                | 0.97 (0.96-0.99)  | 0.004  |                  |        |
| - BUN (mg/dL)                        | 1.05 (1.04-1.05)  | <0.001 |                  |        |
| - Ionized calcium (mmol/L)           | 1.75 (1.56-1.96)  | <0.001 |                  |        |
| - Glucose (mg/dL)                    | 1.01 (1.00-1.01)  | <0.001 |                  |        |
| - Albumin (g/dL)                     | 0.34 (0.30-0.38)  | <0.001 | 0.74 (0.62-0.87) | <0.001 |
| - pH                                 | 5.07 (2.29-11.22) | <0.001 |                  |        |
| - pO2 (mmHg)                         | 1.00 (1.00-1.00)  | 0.54   |                  |        |
| - hemoglobin (g/dL)                  | 0.88 (0.86-0.90)  | <0.001 | 0.91 (0.88-0.93) | <0.001 |
| - WBC (10 <sup>9</sup> cells/L)      | 1.05 (1.03-1.07)  | <0.001 |                  |        |
| - Platelet (10 <sup>9</sup> cells/L) | 1.00 (1.00-1.00)  | 0.06   |                  |        |
| - INR                                | 2.70 (2.21-3.29)  | <0.001 |                  |        |

|                          |                  |        |                  |        |
|--------------------------|------------------|--------|------------------|--------|
| - Lactate (mmol/L)       | 1.12 (1.05-1.19) | 0.001  |                  |        |
| - eGFR (mL/min/1.73 m2)  | 0.97 (0.97-0.98) | <0.001 | 0.98 (0.97-0.98) | <0.001 |
| - positive blood culture | 1.49 (0.83-2.67) | 0.18   |                  |        |

Abbreviations: ACEI, angiotensin-converting enzyme inhibitors; ARBs, Angiotensin II receptor blockers; BUN, blood urea nitrogen; CABG, coronary artery bypass graft surgery; COPD, chronic obstructive pulmonary disease; eGFR, estimated glomerular filtration rate; IABP, intra-aortic balloon pump; INR, international normalized ratio; LVEF, left ventricular ejection fraction; NSAIDs, non-steroidal anti-inflammatory drugs; pH, potential of hydrogen; pO<sub>2</sub>, partial pressure of oxygen; RVSP, right ventricular systolic pressure; WBC, white blood cell.

## Supplementary method

### AutoML

```
y <- "AKI"
```

```
x <- setdiff(names(train), y)
```

```
aml <- h2o.automl(x = x,  
  y = y,  
  training_frame = train,  
  leaderboard_frame = valid,  
  max_runtime_secs = 3600,  
  seed = 123) #default 1 hour 3600 secs, more time, more accurate
```

```
# Task Leaderboard Exploration
```

```
lb <- aml@leaderboard
```

```
print(lb, n = nrow(lb))
```

```
best_model <- aml@leader
```

```
lb_df <- as.data.frame(lb)
```

```
model_ids <- lb_df$model_id
```

### **Decision Tree**

For DT analysis, the number of terminal nodes was determined considering the scree plot showing the relationship between the tree size and coefficient of variance. The decision tree was pruned based on cross-validated error results using the complexity parameter associated with the minimal error.

```
library(rpart)
```

```
library(rpart.plot)
```

```
classifier = rpart(formula = AKI ~ .,
```

```
                    data = training_set, method = "class")
```

```
plotcp(classifier)
```

```
min_cp = classifier$cptable[which.min(classifier$cptable[, "xerror"]), "CP"]
```

```
Rpart_prune = prune(classifier, cp = min_cp)
```

```
prp(Rpart_prune)
```

```
prp(Rpart_prune, type = 1)
```

```
rpart.plot(Rpart_prune)
```

### **Random Forest**

```
library(randomForest)
```

```
randomForest(formula = AKI ~ ., data = training_set_scaled, importance = TRUE)
```

Type of random forest: classification

Number of trees: 500

No. of variables tried at each split: 8

### **XGBoost**

```
library(caret)
```

```
xgb_trcontrol = trainControl(  
  method = "cv",  
  number = 5,  
  allowParallel = TRUE,  
  verboseIter = FALSE,  
  returnData = FALSE  
)
```

```
xgbGrid<-expand.grid(nrounds = c(100,200),  
  max_depth = c(10,15,20,25),  
  colsample_bytree = seq(0.5, 0.9, length.out = 5),  
  eta = c(0.1, 0.2, 0.3),  
  gamma = c(0, 0.1, 0.2, 0.3),  
  min_child_weight = 1,  
  subsample = 1)  
set.seed(123)
```

```
xgb_model = train(AKI~.,  
  data = training_set_onehot,  
  trControl = xgb_trcontrol,  
  tuneGrid = xgbGrid,  
  method = "xgbTree")  
xgb_model$finalModel
```

## ANN

### **Grid Hyper-Parameter Search**

```
hyper_params <- list(
  activation=c("Rectifier","Tanh","Maxout","RectifierWithDropout","TanhWithDropout","MaxoutWithDropout"),
  hidden=list(c(20,20),c(50,50),c(30,30,30),c(25,25,25,25)),
  input_dropout_ratio=c(0,0.05),
  l1=seq(0,1e-4,1e-6),
  l2=seq(0,1e-4,1e-6)
)
hyper_params
```

```
response = "AKI"
predictors = setdiff(names(train), response)
```

```
## Stop once the top 5 models are within 1% of each other (i.e., the windowed average varies less than 1%)
search_criteria = list(strategy = "RandomDiscrete", max_runtime_secs = 360, max_models = 100, seed=1234567, stopping_rounds=5,
stopping_tolerance=1e-2)
dl_random_grid <- h2o.grid(
  algorithm="deeplearning",
  grid_id = "dl_grid_random",
  training_frame=train,
  validation_frame=valid, #we need validation set
  x=predictors,
  y=response,
  epochs=1,
  stopping_metric="logloss",
  stopping_tolerance=1e-2,      ## stop when logloss does not improve by >=1% for 2 scoring events
  stopping_rounds=2,
  score_validation_samples=10000, ## downsample validation set for faster scoring
  score_duty_cycle=0.025,      ## don't score more than 2.5% of the wall time
  max_w2=10,                  ## can help improve stability for Rectifier
  hyper_params = hyper_params,
  search_criteria = search_criteria
)
grid <- h2o.getGrid("dl_grid_random",sort_by="logloss",decreasing=FALSE)
grid
```

```

grid@summary_table[1,]
best_model1 <- h2o.getModel(grid@model_ids[[1]]) ## model with lowest logloss
best_model1

```

### Grid ID: dl\_grid\_random

Used hyper parameters:

- activation
- hidden
- input\_dropout\_ratio
- l1
- l2

Number of models: 100

Number of failed models: 0

Hyper-Parameter Search Summary: ordered by increasing logloss

|   | activation        | hidden           | input_dropout_ratio | l1      | l2      | model_ids               | logloss |
|---|-------------------|------------------|---------------------|---------|---------|-------------------------|---------|
| 1 | Rectifier         | [30, 30, 30]     | 0.00000             | 0.00003 | 0.00001 | dl_grid_random_model_80 | 0.56554 |
| 2 | MaxoutWithDropout | [25, 25, 25, 25] | 0.05000             | 0.00006 | 0.00001 | dl_grid_random_model_19 | 0.56835 |
| 3 | MaxoutWithDropout | [25, 25, 25, 25] | 0.00000             | 0.00001 | 0.00001 | dl_grid_random_model_68 | 0.56963 |
| 4 | MaxoutWithDropout | [20, 20]         | 0.00000             | 0.00006 | 0.00002 | dl_grid_random_model_84 | 0.57416 |
| 5 | Tanh              | [30, 30, 30]     | 0.00000             | 0.00004 | 0.00002 | dl_grid_random_model_23 | 0.57763 |

---

|     | activation        | hidden       | input_dropout_ratio | l1      | l2      | model_ids               | logloss |
|-----|-------------------|--------------|---------------------|---------|---------|-------------------------|---------|
| 95  | Rectifier         | [50, 50]     | 0.00000             | 0.00008 | 0.00002 | dl_grid_random_model_96 | 1.72986 |
| 96  | Maxout            | [20, 20]     | 0.05000             | 0.00001 | 0.00000 | dl_grid_random_model_59 | 1.93356 |
| 97  | Rectifier         | [30, 30, 30] | 0.05000             | 0.00006 | 0.00006 | dl_grid_random_model_18 | 2.01191 |
| 98  | Maxout            | [20, 20]     | 0.00000             | 0.00010 | 0.00009 | dl_grid_random_model_99 | 2.04596 |
| 99  | Maxout            | [20, 20]     | 0.05000             | 0.00010 | 0.00003 | dl_grid_random_model_61 | 2.33901 |
| 100 | MaxoutWithDropout | [20, 20]     | 0.05000             | 0.00001 | 0.00007 | dl_grid_random_model_65 | 2.41733 |

```

ANNBestmodel = h2o.deeplearning(y = 'AKI',
                                training_frame = as.h2o(training_set_scaled),
                                activation = 'RectifierWithDropout',
                                hidden = c(50,50),
                                epochs = 1,

```

```

seed = 1234751,
input_dropout_ratio = 0.05,
l1 = 4.5e-05,
l2 = 3e-06,
max_w2 = 10,
distribution = 'bernoulli',
score_validation_samples = 10000,
score_duty_cycle = 0.025,
stopping_rounds = 2,
stopping_metric = 'logloss',
stopping_tolerance = 0.01,
max_runtime_secs = 350.293,
train_samples_per_iteration = -2)

```

### **Evaluation indices**

In assessing the classification efficiency of all classifiers, a confusion matrix is important. It is a 2-2 matrix that offers details about the real and forecast classifications. There are four components in the confusion matrix: true positive (TP), true negative (TN), FP, and FN. A patient who dies can be classified correctly (TP) or incorrectly (FN), and a patient who survives can be classified correctly (TN) or incorrectly (FP).

The evaluation indices are defined as:

- Accuracy =  $(TP + TN) / (TP + TN + FP + FN)$ .
- Precision =  $TP / (TP + FP)$
- ERR =  $(FP + FN) / (TP + TN + FN + FP)$
- MCC =  $((TP \times TN) - (FP \times FN)) / \sqrt{((TP + FP)(TP + FN)(TN + FP)(TN + FN))}$
- F-score =  $(2 \times \text{precision} \times \text{recall}) / (\text{precision} + \text{recall})$ .

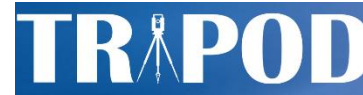

## TRIPOD Checklist: Prediction Model Development

| Section/Topic                | 1   | Checklist Item                                                                                                                                                                                   | Page |
|------------------------------|-----|--------------------------------------------------------------------------------------------------------------------------------------------------------------------------------------------------|------|
| <b>Title and abstract</b>    |     |                                                                                                                                                                                                  |      |
| Title                        | 1   | Identify the study as developing and/or validating a multivariable prediction model, the target population, and the outcome to be predicted.                                                     | 1    |
| Abstract                     | 2   | Provide a summary of objectives, study design, setting, participants, sample size, predictors, outcome, statistical analysis, results, and conclusions.                                          | 2    |
| <b>Introduction</b>          |     |                                                                                                                                                                                                  |      |
| Background and objectives    | 3a  | Explain the medical context (including whether diagnostic or prognostic) and rationale for developing or validating the multivariable prediction model, including references to existing models. | 3    |
|                              | 3b  | Specify the objectives, including whether the study describes the development or validation of the model or both.                                                                                | 4    |
| <b>Methods</b>               |     |                                                                                                                                                                                                  |      |
| Source of data               | 4a  | Describe the study design or source of data (e.g., randomized trial, cohort, or registry data), separately for the development and validation data sets, if applicable.                          | 5    |
|                              | 4b  | Specify the key study dates, including start of accrual; end of accrual; and, if applicable, end of follow-up.                                                                                   | 5-6  |
| Participants                 | 5a  | Specify key elements of the study setting (e.g., primary care, secondary care, general population) including number and location of centres.                                                     | 5-6  |
|                              | 5b  | Describe eligibility criteria for participants.                                                                                                                                                  | 5    |
|                              | 5c  | Give details of treatments received, if relevant.                                                                                                                                                | 5-6  |
| Outcome                      | 6a  | Clearly define the outcome that is predicted by the prediction model, including how and when assessed.                                                                                           | 5-6  |
|                              | 6b  | Report any actions to blind assessment of the outcome to be predicted.                                                                                                                           | 5-6  |
| Predictors                   | 7a  | Clearly define all predictors used in developing or validating the multivariable prediction model, including how and when they were measured.                                                    | 5-6  |
|                              | 7b  | Report any actions to blind assessment of predictors for the outcome and other predictors.                                                                                                       | 7-8  |
| Sample size                  | 8   | Explain how the study size was arrived at.                                                                                                                                                       | 8    |
| Missing data                 | 9   | Describe how missing data were handled (e.g., complete-case analysis, single imputation, multiple imputation) with details of any imputation method.                                             | 5    |
| Statistical analysis methods | 10a | Describe how predictors were handled in the analyses.                                                                                                                                            | 5-6  |
|                              | 10b | Specify type of model, all model-building procedures (including any predictor selection), and method for internal validation.                                                                    | 6-8  |
|                              | 10d | Specify all measures used to assess model performance and, if relevant, to compare multiple models.                                                                                              | 6-8  |
| Risk groups                  | 11  | Provide details on how risk groups were created, if done.                                                                                                                                        | 6-8  |

| <b>Results</b>            |     |                                                                                                                                                                                                       |               |
|---------------------------|-----|-------------------------------------------------------------------------------------------------------------------------------------------------------------------------------------------------------|---------------|
| Participants              | 13a | Describe the flow of participants through the study, including the number of participants with and without the outcome and, if applicable, a summary of the follow-up time. A diagram may be helpful. | 8-9           |
|                           | 13b | Describe the characteristics of the participants (basic demographics, clinical features, available predictors), including the number of participants with missing data for predictors and outcome.    | 8-9           |
| Model development         | 14a | Specify the number of participants and outcome events in each analysis.                                                                                                                               | 9-12          |
|                           | 14b | If done, report the unadjusted association between each candidate predictor and outcome.                                                                                                              | 11-12         |
| Model specification       | 15a | Present the full prediction model to allow predictions for individuals (i.e., all regression coefficients, and model intercept or baseline survival at a given time point).                           | 13            |
|                           | 15b | Explain how to use the prediction model.                                                                                                                                                              | 13-16         |
| Model performance         | 16  | Report performance measures (with CIs) for the prediction model.                                                                                                                                      | 13-16         |
| <b>Discussion</b>         |     |                                                                                                                                                                                                       |               |
| Limitations               | 18  | Discuss any limitations of the study (such as nonrepresentative sample, few events per predictor, missing data).                                                                                      | 20            |
| Interpretation            | 19b | Give an overall interpretation of the results, considering objectives, limitations, and results from similar studies, and other relevant evidence.                                                    | 18-20         |
| Implications              | 20  | Discuss the potential clinical use of the model and implications for future research.                                                                                                                 | 20            |
| <b>Other information</b>  |     |                                                                                                                                                                                                       |               |
| Supplementary information | 21  | Provide information about the availability of supplementary resources, such as study protocol, Web calculator, and data sets.                                                                         | Supplementary |
| Funding                   | 22  | Give the source of funding and the role of the funders for the present study.                                                                                                                         | 21            |
